# Supplementary material
Source: publisher figshare collection journal article supplement (https://acs.figshare.com/ndownloader/files/11721422)
Supplement: Supplementary file 1 [file 11721422]

## **Supporting Information**

Native alanine substitution in the glycine hinge modulates conformational flexibility of Heme Nitric oxide/Oxygen (H-NOX) sensing proteins

Charles W. Hespen<sup>†,§</sup>, Joel J. Bruegger<sup>†,§</sup>, Yirui Guo<sup>†</sup>, Michael A. Marletta<sup>\*,†,‡</sup>

A

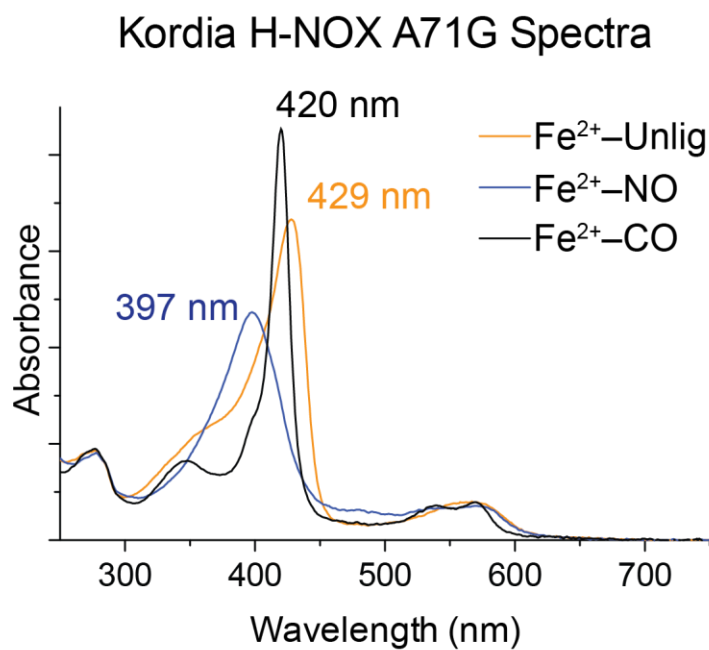

B

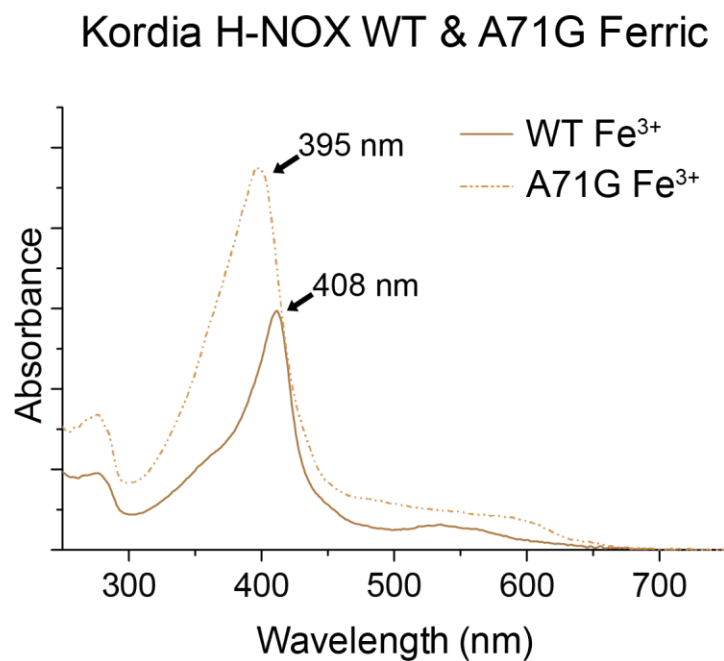

**Fig. S1.** (A) Ligand spectra of A71G *Ka* H-NOX. (B) Ferric spectra of WT and A71G *Ka* H-NOX.

A

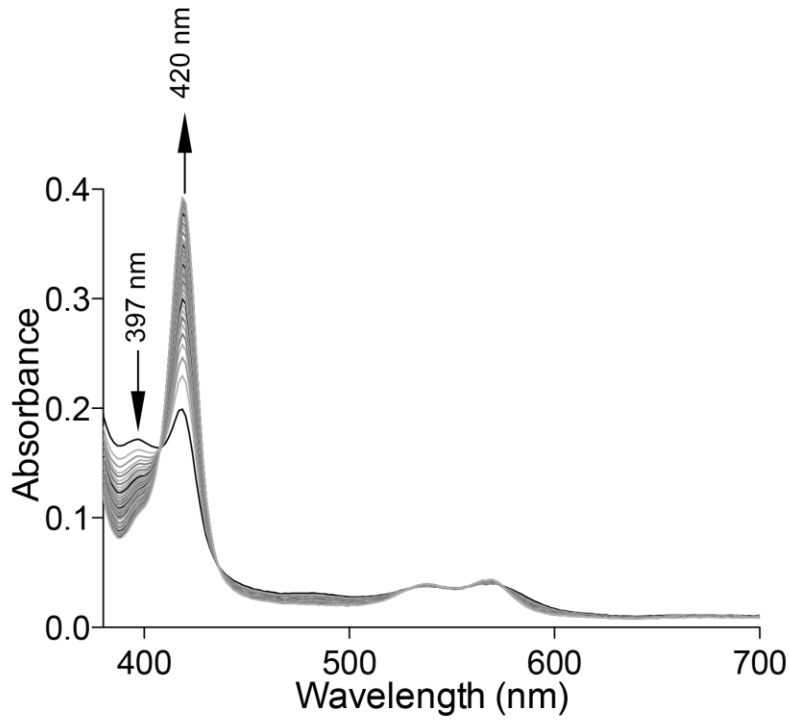

B

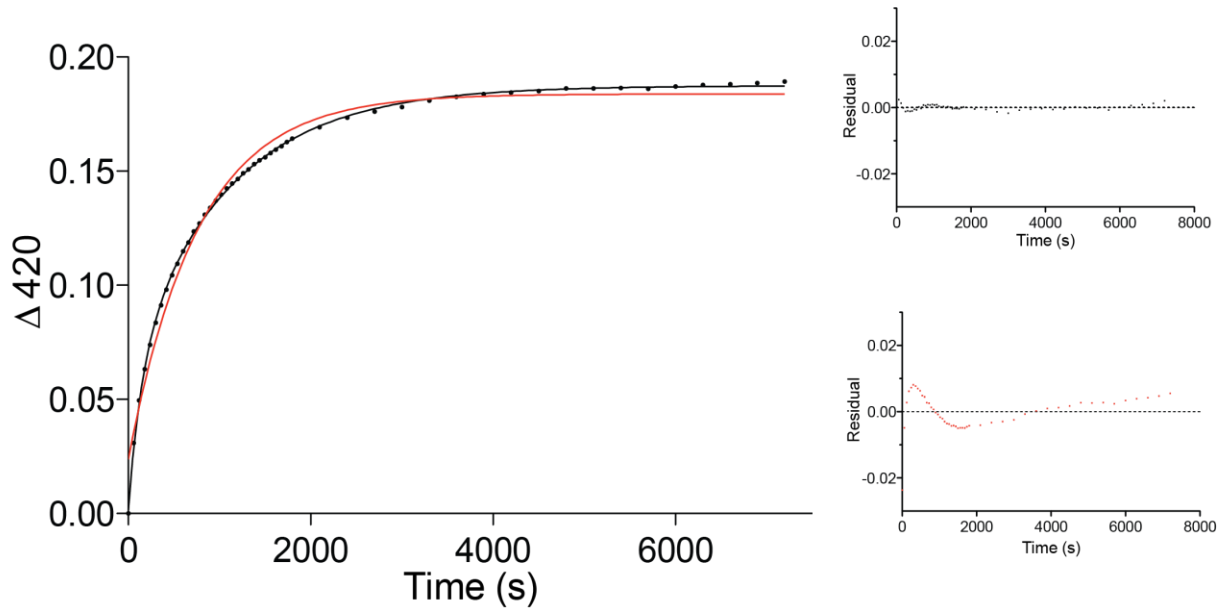

**Fig. S2.** (A) Example NO dissociation measurement spectra of WT *Ka* H-NOX. NO dissociation was measured using a CO/dithionite trap. The increase of the Soret peak at 420 nm was used to measure the  $k_{off}$  for NO. (B) Plot of  $\Delta 420$  nm versus time. Data was fit to one (red) or two (black) phase exponential decay. On the right panel, residuals indicate that data better fits a two-phase decay model.

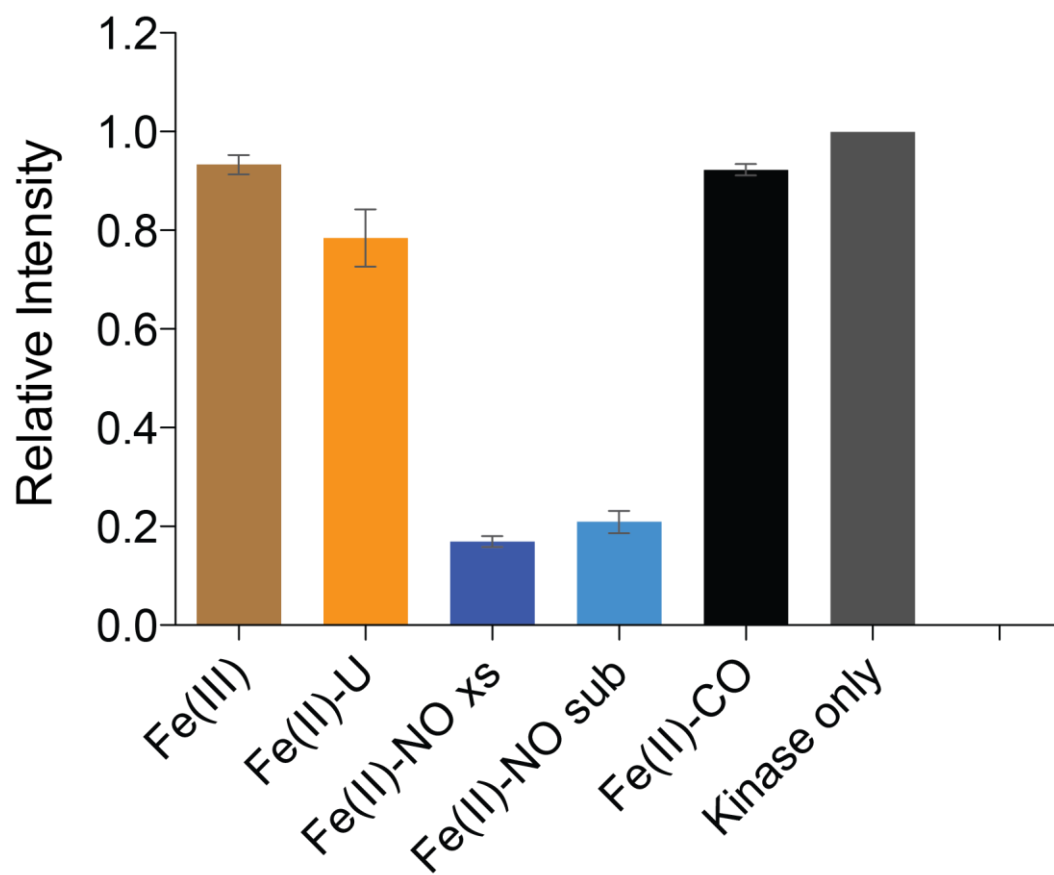

**Fig. S3.** HnoK (2  $\mu$ M) autophosphorylation assay with 10  $\mu$ M H-NOX A71G at different heme ligation or oxidation states. Kinase autophosphorylation measured with [ $^{32}$ P]- $\gamma$ -ATP.

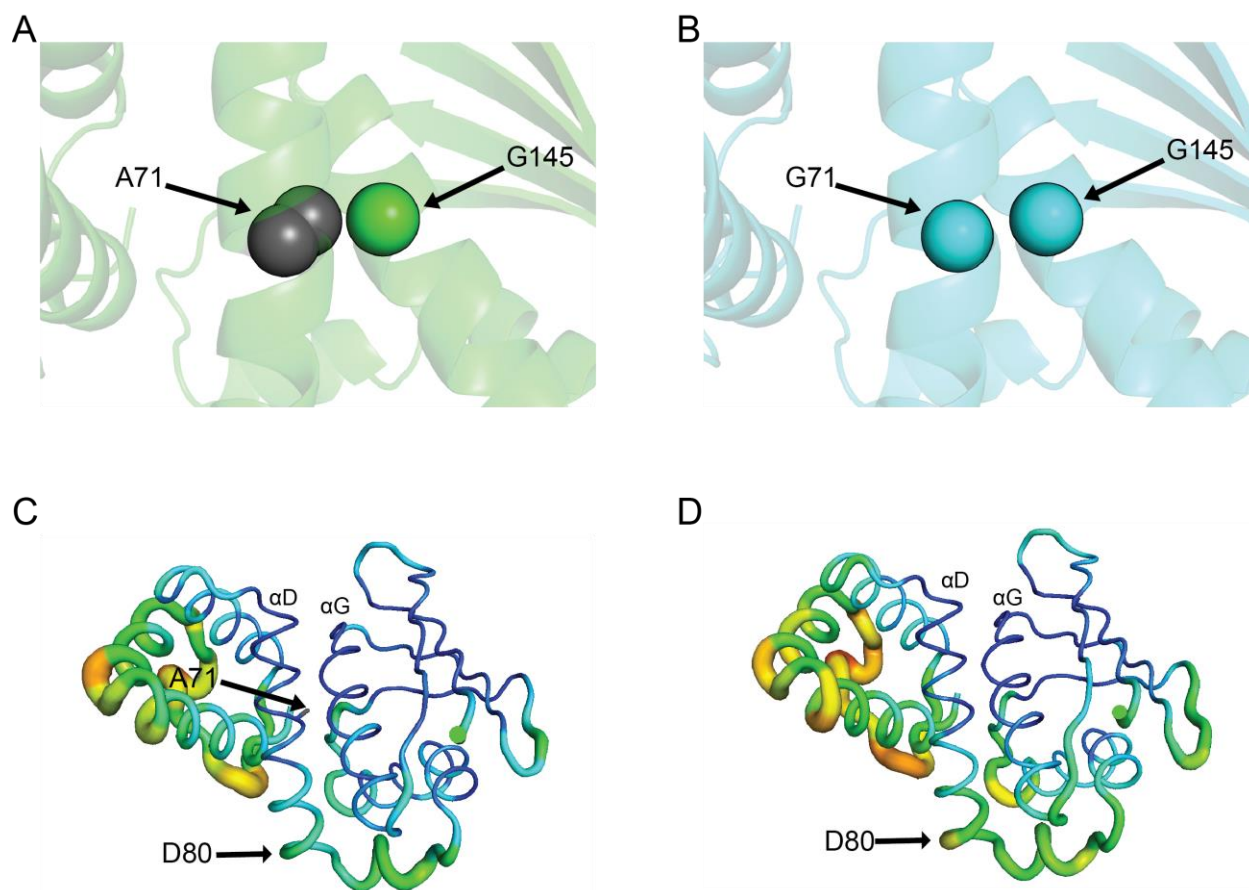

**Fig. S4.** (Panels A & B) Close-up views of the hinge residues in WT (A) and A71G (B) structures. The hinge residues are shown as spheres to emphasize close proximity of residues. A71 is highlighted in grey. (Panels C & D) B-factor putty of  $\alpha$ D and  $\alpha$ G interface. A71 is noted in grey for reference. Asp80 at the end of helix  $\alpha$ D has higher flexibility.

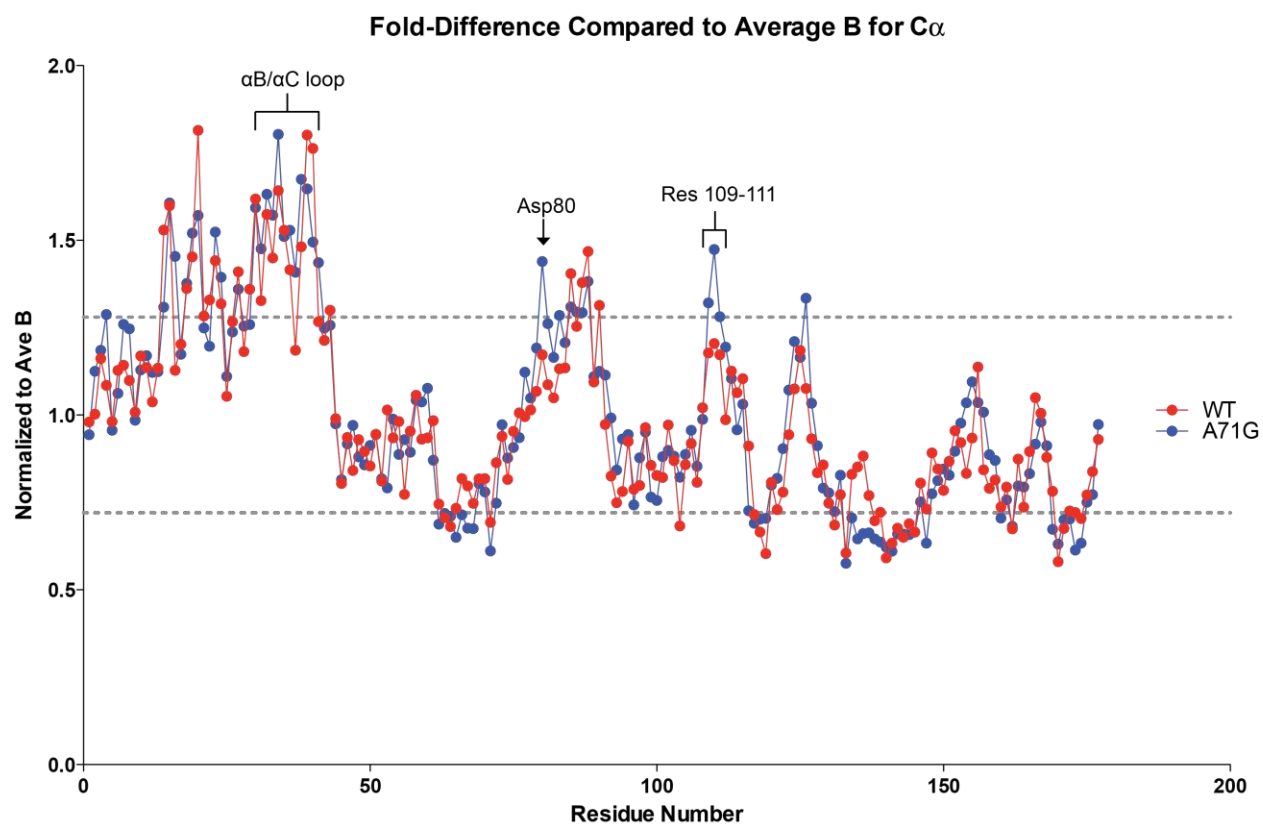

**Fig. S5.** B-factor differences after normalization of C $\alpha$ . B-factors were normalized to the average b-factor of each structure. Grey dotted line represents standard deviation of b-factor differences in WT *Ka* H-NOX. The last six residues with higher than average b-factor values are part of a C-terminal TEV cleavage scar, not part of the native protein sequence, and, therefore, were not included in the b-factor averages.

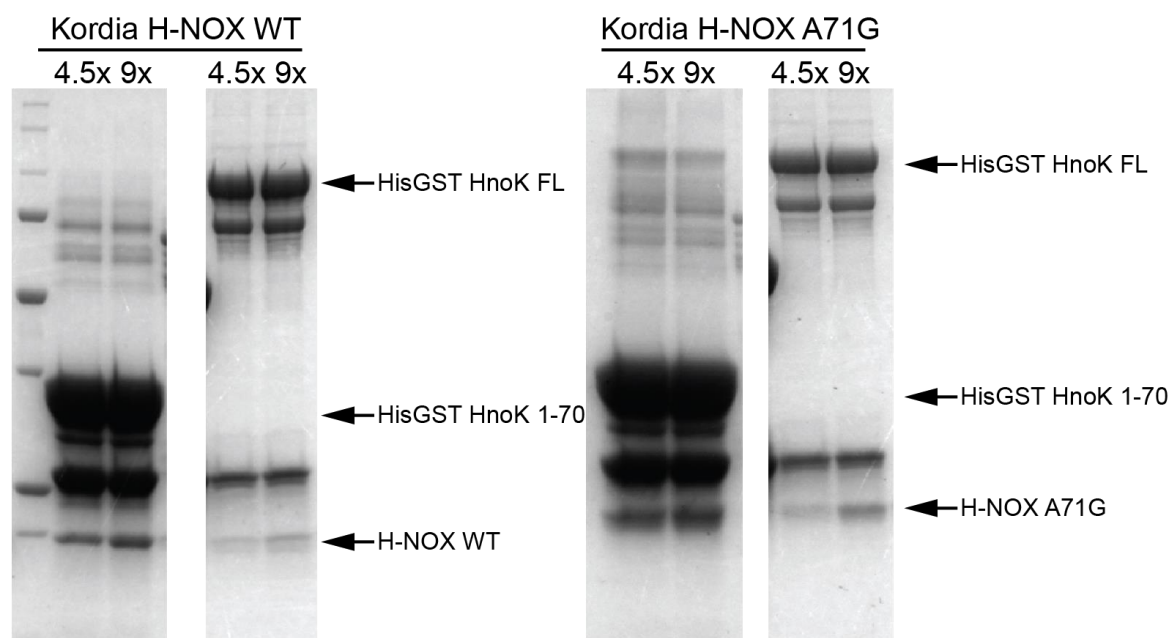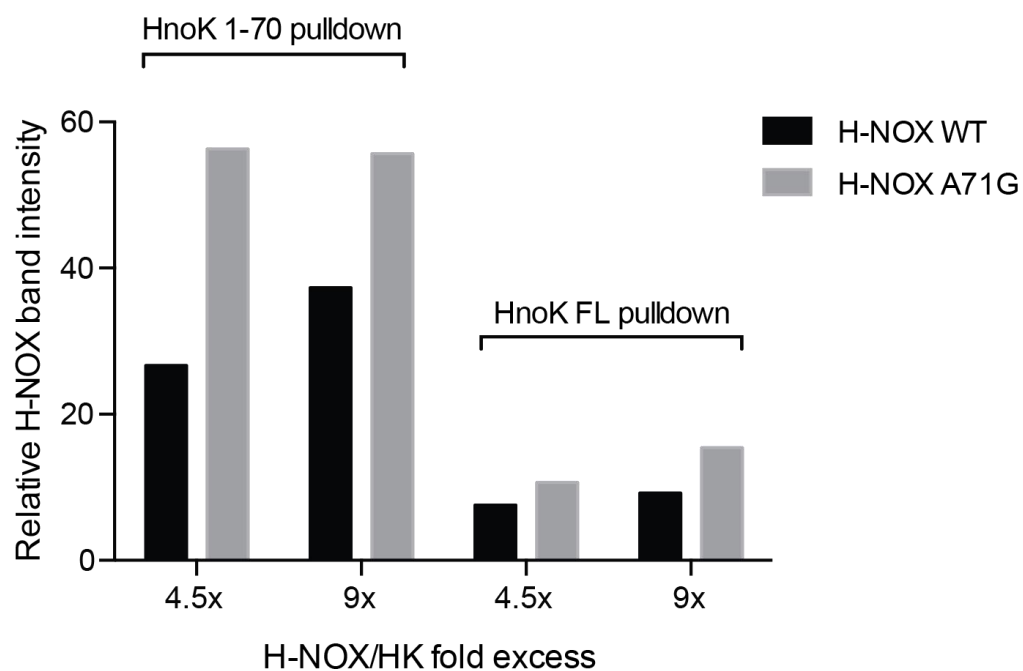

**Fig. S6.** Pull down assay of HisGST-tagged HnoK full-length of residues 1-70. H-NOX band intensity was normalized to eluted HisGST HnoK band. Quantification of bands indicates that H-NOX A71G has a higher affinity for full-length and residues 1-70 of HnoK compared to WT H-NOX.

**Table S1. *Kordia algicida* H-NOX crystal statistics**

|                                          | WT                                                  | A71G                                                |
|------------------------------------------|-----------------------------------------------------|-----------------------------------------------------|
| PDB Code                                 | 6BDD                                                | 6BDE                                                |
| <b>Crystallization</b>                   | 0.1 M Tris-HCl pH 8.5<br>0.3 M LiCl<br>34% PEG 6000 | 0.1 M Tris-HCl pH 8.5<br>0.3 M LiCl<br>34% PEG 6000 |
| <b>Crystallographic Data</b>             |                                                     |                                                     |
| Beamline                                 | ALS 5.0.1                                           | ALS 5.0.1                                           |
| Wavelength (Å)                           | 0.977                                               | 0.977                                               |
| Space Group                              | p2 <sub>1</sub> 2 <sub>1</sub> 2 <sub>1</sub>       | p2 <sub>1</sub> 2 <sub>1</sub> 2 <sub>1</sub>       |
| Cell Dimensions (a, b, c) (Å)            | 48.97, 57.61, 68.80                                 | 48.79, 56.73, 68.75                                 |
|                                          | $\alpha=\beta=\gamma=90^\circ$                      | $\alpha=\beta=\gamma=90^\circ$                      |
| Resolution (Å)                           | 39.89-1.90                                          | 37.0-1.64                                           |
| No. of observations                      | 94510                                               | 288820                                              |
| No. of unique observations               | 15750                                               | 23652                                               |
| Completeness, %                          | 99.0 (91.4)                                         | 98.5 (88.2)                                         |
| I/ $\sigma$ (I)                          | 9.78 (2.41)                                         | 15.60 (3.75)                                        |
| Rmerge, %                                | 0.11 (0.67)                                         | 0.081 (0.530)                                       |
| Redundancy                               | 6                                                   | 12.2                                                |
| CC1/2                                    | 0.616                                               | 0.95                                                |
| <b>Refinement</b>                        |                                                     |                                                     |
| Resolution (Å)                           | 39.89-1.90 (1.97-1.90)                              | 37.0-1.64 (1.70-1.64)                               |
| No. of protein atoms                     | 1496                                                | 1495                                                |
| No. of ligand atoms                      | 43                                                  | 43                                                  |
| No. of water atoms                       | 129                                                 | 126                                                 |
| Rfree, %                                 | 24.2                                                | 23.6                                                |
| Rcrys, %                                 | 19.3                                                | 21                                                  |
| <b>Geometry</b>                          |                                                     |                                                     |
| RMS bonds (Å)                            | 0.004                                               | 0.024                                               |
| RMS angles (°)                           | 0.65                                                | 2.04                                                |
| Ramachandran Favored (%)                 | 97.3                                                | 98.4                                                |
| Ramachandran Allowed (%)                 | 2.7                                                 | 1.1                                                 |
| Ramachandran Disallowed (%)              | 0                                                   | 0.6                                                 |
| <b>Average B-factors (Å<sup>2</sup>)</b> |                                                     |                                                     |
| Protein                                  | 42.7                                                | 47.5                                                |
| Water                                    | 47.6                                                | 52.1                                                |
| Ligands                                  | 31.9                                                | 36                                                  |
